# Supplementary material
Source: publisher figshare collection journal article supplement (https://tandf.figshare.com/ndownloader/files/17943017)

**Appendix A**

a) OMGRate-e: physician examination component of the OMGRate

b) OMGRate-q: patient-response component of the OMGRate

(a)

**(b)**

Note for scoring: Never=0; Rarely=1; Sometimes=2; Often=3; Always=4.

Scores for questions number 5, 6, and 8 are doubled.

**Appendix B**

Inter-rater reliability results for each item of OMGRate-e

**Appendix C**

Simplified OMGRate-e


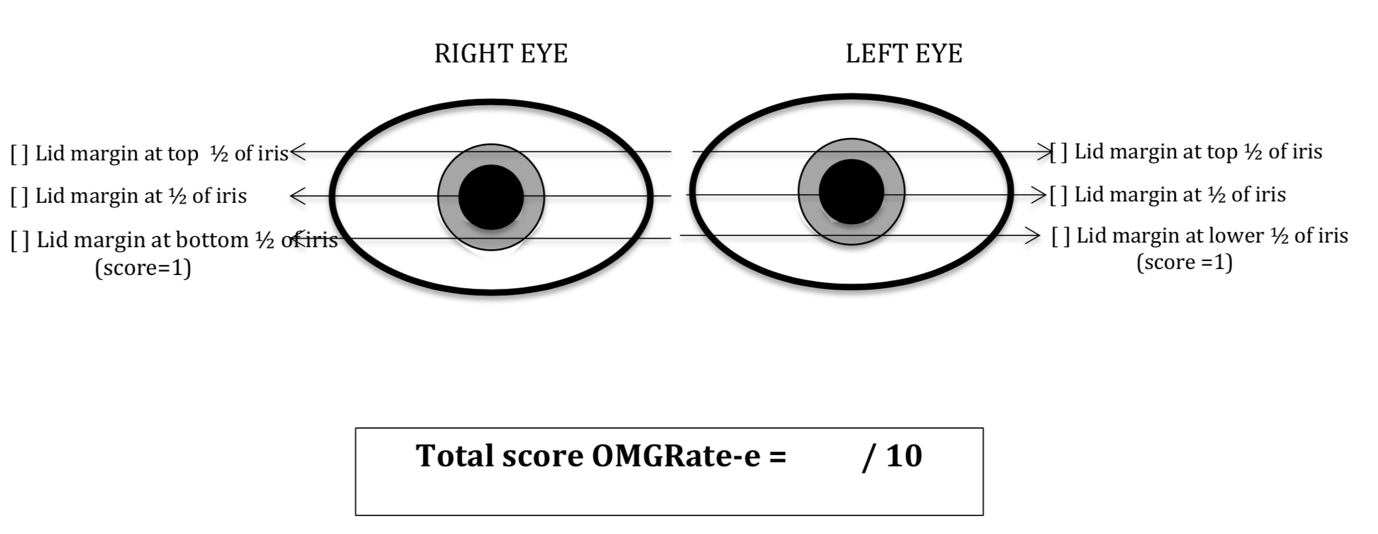

Supplement: Supplementary file 1 [file 17943017]
